# Supplementary material for: Integrin β3 targeting biomaterial preferentially promotes secretion of bFGF and viability of iPSC-derived vascular smooth muscle cells
Source: Royal Society of Chemistry journal article supplement (doi:10.1039/d1bm00162k), 2021-01-01
Supplement: d1bm00162k1.pdf [file d1bm00162k1.pdf]

## **Integrin $\beta$ 3 Targeting Biomaterial Preferentially Promotes Secretion of bFGF and Viability of iPSC-Derived Vascular Smooth Muscle Cells**

Biraja C. Dash<sup>1\*</sup>, Kaiti Duan<sup>1</sup>, Themis R. Kyriakides<sup>2,3,4</sup>, and Henry C. Hsia<sup>1,2\*</sup>

<sup>1</sup>Section of Plastic Surgery, Department of Surgery, Yale School of Medicine, Yale University,  
New Haven, CT 06510, USA

<sup>2</sup>Department of Biomedical Engineering, Yale University, New Haven, CT 06510, USA

<sup>3</sup>Department of Pathology, Yale University, New Haven, CT, 06510, USA

<sup>4</sup>Vascular Biology and Therapeutics Program, Yale University, New Haven, CT, 06510, USA

\*Corresponding authors email: [biraja.dash@yale.edu](mailto:biraja.dash@yale.edu); [henry.hsia@yale.edu](mailto:henry.hsia@yale.edu);

Address: Yale University School of Medicine, 330 Cedar St., BB 3<sup>rd</sup> Floor, PO Box 208041,  
New Haven, Connecticut 06510, Telephone: 203 737-2049, Fax: 203 785-5714

**Materials:**

Type I rat tail collagen type-I was purchased from Enzo Life Sciences, USA. Human plasma fibronectin was purchased from Milipore Sigma, USA. 4-arm polyethylene glycol succinimidyl glutarate Mw 10,000 (4S-StarPEG) was purchased from JenKem Technology, USA. Growth factor reduced matrigel was purchased from Corning Life Sciences (Catalog Number: 356231), USA. Trinitrobenzene sulfonic acid (TNBSA) and AlamarBlue reagents were purchased from ThermoFisher Scientific, USA. Rhodamine phalloidin (R415) was purchased from Invitrogen, Thermo Fisher Scientific, USA. Smooth muscle cells culture medium (SmGM-2) was purchased from PromoCell, Germany. All other cell culture reagents were purchased from ThermoFisher Scientific unless otherwise stated.

**2,4,6-trinitrobenzene sulfonic acid assay:**

2,4,6-Trinitrobenzene Sulfonic Acid (TNBSA) assay was performed to determine the amount of free amines in the scaffolds with and without cross-linking. Briefly, the scaffolds were first made inside Eppendorf tubes following the supplementary table described above. Then the scaffolds were disrupted using crushers, which would turn the scaffold inside a viscous consistency. 250uL of 0.01% TNBSA was added into 500uL of each sample. A 0.2% glutaraldehyde solution was used as a positive control. The resultant mixtures were incubated at 37°C for 2 hours. Glycine titration in sodium bicarbonate (0.1M) pH 8.5 standard curve was established at: 300  $\mu$ m, 250  $\mu$ m, 200  $\mu$ m, 150  $\mu$ m, 100  $\mu$ m, 75  $\mu$ m, 50  $\mu$ M, 25  $\mu$ m, and 0  $\mu$ m. At the conclusion of the incubation, 250  $\mu$ l of 10% sodium dodecyl sulfates was added. 125  $\mu$ l of 1M HCl was added to stop the reaction. 100  $\mu$ l of the final solution was used to test for the degree of

free amine groups in fibronectin infused collagen scaffolds. Plate reader absorbance was set at 335 nm.

**Table-S1:** Information related to primary antibodies.

| Primary Antibody | Dilution                              | Catalog Number/ Manufacturer |
|------------------|---------------------------------------|------------------------------|
| SDF-1 $\alpha$   | 1:2500 ELISA                          | MAB350 (R&D)                 |
| PDGFAA           | 1:2500 ELISA                          | 500-P46-100 (PeproTech)      |
| bFGF             | 1:2500 ELISA                          | 500M38 (PeproTech)           |
| VEGF             | 1:2500 ELISA; 1:200 IHC               | AB-119 (Abcam)               |
| SM-22 $\alpha$   | 1:300 IF and IHC<br>1 $\mu$ g/ml FACS | AB-10135 (Abcam)             |
| $\alpha$ -SMA    | 1:200 IF<br>1 $\mu$ g/ml FACS         | SC-32251 (SantaCruz Biotech) |
| Calponin         | 1:200 IF and IHC<br>1 $\mu$ g/ml FACS | C-2687 (Sigma)               |
| SM-MHC           | 1:300 IF and IHC<br>1 $\mu$ g/ml FACS | AB-53219 (Abcam)             |

| Secondary Antibody        | Dilution         | Catalog Number/ Manufacturer |
|---------------------------|------------------|------------------------------|
| Anti-Mouse-HRP            | 1:2500 ELISA     | AB6789 (Abcam)               |
| Anti-Rabbit-HRP           | 1:2500 ELISA     | A0545 (Sigma)                |
| Anti-Mouse-Alexafluor488  | 1:400 IF and IHC | A11029 (ThermoFisher)        |
| Anti-Mouse-Alexafluor568  | 1:400 IF and IHC | A11031 (ThermoFisher)        |
| Anti-Rabbit-Alexafluor555 | 1:400 IF and IHC | A31572 (ThermoFisher)        |
| Anti-Goat-Alexafluor488   | 1:400 IF and IHC | A27012 (ThermoFisher)        |

**Table-S2:** Information related to secondary antibodies.

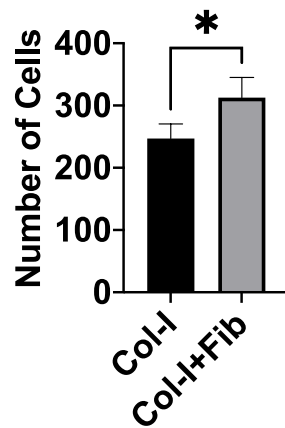

Figure S1: **Characterization of cell viability in the scaffold.** The graph shows the total number of cells (combined number of Calcein-AM positive live cells and EthD-1-stained dead cells). Collagen scaffolds without fibronectin were kept as controls for all the experiments. \* denotes statistical significance differences between the different groups (n=3, t-test, \*p<0.05).

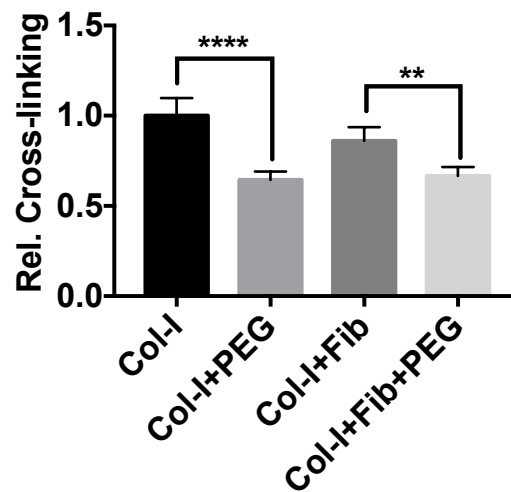

**Figure S2: Characterization of 4S-StarPEG cross-linking.** TNBSA showing a qualitative analysis of free amine groups in crosslinked collagen scaffolds of 4mg/ml of collagen concentration with and without fibronectin (100  $\mu$ g/ml). Uncross-linked collagen scaffolds with and without fibronectin were kept as a controls. \* denotes statistical significance differences between the different groups (n=4, t-test, \*\*p<0.01, \*\*\*\*p<0.0001).

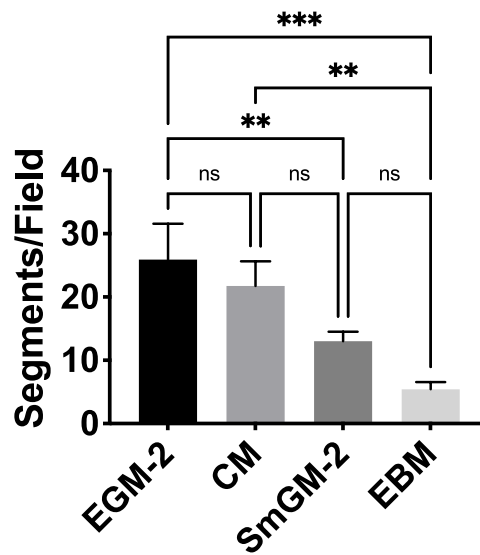

**Figure S3: Characterization of in vitro network formation.** Graph showing the number of segments/field of the endothelial cell network formed on matrigel. Endothelial cell (EGM-2) and smooth muscle cell (SmGM-2) growth medium, and endothelial cell basal medium (EBM) were used as controls. \* denotes statistical significance differences between the different groups (n=3, one-way ANOVA, \*p<0.05, \*\*p<0.01, \*\*\*p<0.001).
